# Supplementary material
Source: HighWire-hosted journal article supplement (https://erj.ersjournals.com/content/50/6/1701193)
Supplement: inline-supplementary-material-1 [file inline-supplementary-material-1.pdf]

## **ONLINE SUPPLEMENTARY MATERIALS**

### **Oxidative stress biomarkers and asthma characteristics in adults of the EGEA study**

Miora Andrianjafimasy<sup>1,2</sup>, Farid Zerimech<sup>3,4</sup>, Zeina Akiki<sup>1,2</sup>, Helene Huyvaert<sup>3</sup>, Nicole Le Moual<sup>1,2</sup>, Valérie Siroux<sup>5</sup>, Régis Matran<sup>6,7</sup>, Orianne Dumas<sup>1,2</sup>, Rachel Nadif<sup>1,2</sup>

#### **Affiliations:**

1. INSERM, U1168, Aging and chronic diseases. Epidemiological and Public health approaches, F-94807 Villejuif, France
2. Univ Versailles St-Quentin-en-Yvelines, UMR-S 1168, F-78180 Montigny-le-Bretonneux, France
3. CHU Lille, Service de Biochimie et Biologie moléculaire, F-59000 Lille, France
4. Université de Lille, EA4483, IMPECS, Institut Pasteur de Lille, F-59000 Lille, France
5. Institute for Advanced Biosciences, Centre de recherche UGA-Inserm U1209-CNRS UMR 5309, équipe d'épidémiologie environnementale, Site Santé, Allée des Alpes, F-38700 La Tronche, France
6. CHRU de Lille, France, F-59000 Lille, France
7. Univ Lille Nord de France, F-59000 Lille, France

#### **Corresponding author:**

Miora Andrianjafimasy, INSERM, U 1168, Aging and chronic diseases.  
Epidemiological and Public health approaches, F-94807 Villejuif, France  
Phone number: 33 (0) 145 59 50 73  
Email : [miora.andrianjafimasy@inserm.fr](mailto:miora.andrianjafimasy@inserm.fr)

## Methods

### *Asthma outcomes*

**Asthma control** has been assessed over 3 month period, using responses to EGEA2 survey questions to approximate the Global Initiative for Asthma 2015 definition as closely as possible and as previously used [1]. Participants were defined as having controlled, partly controlled, and uncontrolled asthma if they had none, 1 to 2, or 3 to 4 of the following criteria, respectively: frequent daytime symptoms (defined by  $\geq 1$  asthma attacks or  $\geq 1$  episodes of trouble breathing per week in the past 3 months), any nighttime symptoms (defined as waking because of asthma or an attack of shortness of breath in the last 3 months), frequent use of reliever medication (defined, on average, as more than twice a week in the past 3 months), and any activity limitation (defined by the following answers: “totally limited,” “extremely limited,” “very limited,” “moderate limitation,” and “some limitation” to the question “Overall, among all the activities that you have done during the last two weeks, how limited have you been by your asthma?”).

### *Lung function, allergic and inflammatory characteristics*

A lung function test with spirometry and methacholine challenge was performed using standardized protocol with similar equipment across centers according to the American Thoracic Society / European Respiratory Society guidelines [2]. Forced expiratory volume in one second (FEV<sub>1</sub>) percent predicted value was based on Quanjer et al. reference equations [3]. For participants with a FEV<sub>1</sub>  $\geq 80\%$  of the predicted value, a methacholine bronchial challenge test was performed (maximum dose 4mg) using a Biomedin spirometer (Biomedin

Srl, Padua, Italy) in all centers, except in Lyon, where a Pneumotach Jaeger spirometer (Jaeger) was used [4].

Allergic sensitization was defined by a positive skin prick test (SPT+) with a mean wheal diameter  $\geq 3$  mm than the negative control for at least one of 12 aeroallergens (indoor: cat, *Dermatophagoides pteronyssinus*, *Blattella germanica*, outdoor: olive, birch, *Parietaria judaica*, timothy grass, *Cupressus* and ragweed pollen, and molds: *Aspergillus*, *Cladosporium herbarum*, *Alternaria tenuis*). Subjects were classified as sensitized if they have one or more SPT+ [5].

Total Immunoglobulin E (IgE) determination was assessed by UniCAP system (Pharmacia®) from blood samples in a centralized laboratory, and expressed in international units (IU) per milliliter.

Blood inflammatory patterns were defined from white blood cell (WBC) counts according to eosinophil (EOS) and neutrophil (NEU) counts cut-off points previously described [6, 7]. Briefly, the cut-off point for eosinophils ( $250 \text{ EOS/mm}^3$ ) is the one commonly used in epidemiology, and corresponded to the 75th percentile in the 1356 adults at the EGEA1 study. A cut-off point of  $5000 \text{ NEU/mm}^3$  was chosen that corresponded to the 75th percentile of the distribution.

### ***Determination of biomarkers of oxidative stress***

### ***Blood collection***

Blood samples were collected into 5 mL Vacutainer tubes containing heparinate as an anticoagulant (Becton Dickinson, USA). On the same day, corresponding plasma and glycerolized red blood cells (RBCs) were prepared and stored at -80°C. Briefly, 38% wt/vol glycerol was added progressively to an equal volume of RBCs to obtain a final concentration of 19% glycerol. Glycerolized RBCs aliquots were stored from 2 to 10 years until analysis. Immediately after thawing at room temperature, RBCs were diluted by addition of ice-cold distilled water (1:1); the resulting hemolysate was centrifuged at 3000×g for 10 min at +4°C to remove unbroken cells and large cell debris. Dialysis of the supernatant was performed on D-Tube96™DialyzerMini device (Novagen, Madison, WI, USA). Each kit contains a floating rack allowing dialysis up to 96 samples (10–250 µl) through a dual membrane with molecular weight cutoffs of 6–8 kDa or 12–14 kDa. The 6–8 kDa cutoff was chosen to remove glycerol. 170 µL of supernatant was carefully added to D-Tube96™ previously prehydrated for 10min with distilled water. The floating rack was placed in beaker containing 2 L of 0.1 M sodium phosphate buffer (pH 7.4) and a stir bar [8].

### ***Measurement of antioxidant enzyme activities***

All assays were carried out at the Laboratory of Biochemistry Molecular Biology of CHRU de Lille according to validated and standardized procedures. Catalase activity was measured according to the method by Aebi [8, 9]. Glutathione peroxidase (GPx) and superoxide dismutase (SOD) activities were estimated using commercial available kits (Randox Laboratories, Mauguio, France) according to the method by Paglia and Valentine [8, 10] and McCord and Fridovich [8, 11] respectively.

Total hemoglobin (Hb) concentration was measured by the cyanmethemoglobin method [8, 12]. Activities were expressed as U/g Hb (SOD, GPx) or k/g Hb (catalase). All samples were

analyzed in duplicate or triplicate and analytical intra-run imprecisions (CV) were below 10%.

## **Results**

### **Description of medication data**

Regarding medication for asthma, 59.6% of the participants did not take any medication in the last twelve months. Among those who reported medication use in the last twelve months, 39.2% reported ICS use only and 60.8% reported ICS use in combination with long acting B2-agonists (LABA). In the last three months, 23.3% reported regular use of ICS (ICS or ICS+LABA), and 11.6% reported irregular use of ICS (ICS or ICS+LABA). Median [min-max] main daily ICS dose over the past twelve month was of 250 [50-500] µg of beclomethasone equivalent.

### **Associations between FLOPs level and ICS use**

We performed supplementary analyses between medication expressed in three classes (no use, ICS only and ICS in combination with LABA) and FLOPs level, and found a positive and significant association: geometric mean [Q1; Q3] of FLOPs level was 88.9 [76.7; 100], 93.2 [81.5; 103] and 97.1 [79.7; 109] RFU/mL in no use, ICS only and ICS+LABA respectively,  $P$  for trend=0.01. In addition, we studied the association between FLOPs and ICS dose (µg) over the past twelve months and the ICS use in the last three months expressed as no use/ irregular use / regular use) and found that FLOPs level was positively associated with the ICS use

(geometric mean [Q1; Q3] of FLOPs level was 88.8 [76.5; 100], 90.9 [76.6; 103] and 100 [83.3; 110] RFU/mL in the class of no use, irregular use and regular use respectively ( $p<0.001$ )). We did not find a correlation between FLOPs level and ICS dose.

## References

1. Siroux V, Boudier A, Dolgopoloﬀ M, Chanoine S, Bousquet J, Gormand F, Just J, Le Moual N, Nadif R, Pison C, Varraso R, Matran R, Pin I. Forced midexpiratory flow between 25% and 75% of forced vital capacity is associated with long-term persistence of asthma and poor asthma outcomes. *J. Allergy Clin. Immunol.* 2016; 137: 1709–1716e6.
2. Miller MR, Hankinson J, Brusasco V, Burgos F, Casaburi R, Coates A, Crapo R, Enright P, van der Grinten CPM, Gustafsson P, Jensen R, Johnson DC, MacIntyre N, McKay R, Navajas D, Pedersen OF, Pellegrino R, Viegi G, Wagner J. Standardisation of spirometry. *Eur. Respir. J.* 2005; 26: 319–338.
3. Quanjer PH, Tammeling GJ, Cotes JE, Pedersen OF, Peslin R, Yernault J-C. Lung volumes and forced ventilatory flows. *Eur. Respir. J.* 1993.
4. Siroux V, Pin I, Oryszczyn MP, Le Moual N, Kauffmann F. Relationships of active smoking to asthma and asthma severity in the EGEA study. *Eur. Respir. J.* 2000; 15: 470–477.
5. Burte E, Bousquet J. Characterization of Rhinitis According to the Asthma Status in Adults Using an Unsupervised Approach in the EGEA Study. *PLoS One* 2015; 10: 1–18.
6. Nadif R, Siroux V, Oryszczyn MP, Ravault C, Pison C, Pin I, Kauffmann F. Epidemiological study on the G, Environment of A. Heterogeneity of asthma according to blood inflammatory patterns. *Thorax* 2009; 64: 374–380.
7. Nadif R, Siroux V, Boudier A, Le Moual N, Just J, Gormand F, Pison C. Blood granulocyte patterns as predictors of asthma phenotypes in adults from the EGEA study. *Eur Respir J* 2016; 48: 976–978.
8. Zerimech F, Huyvaert H, Matran R, Nadif R. Usefulness of a new dialysis device adapted to small volume of red blood cells and its interest in epidemiology. *Clin. Biochem.* 2011; 44: 739–741.
9. Aebi H. Catalase. In: Bergmeyer HU, editor. *Methods Enzym. Anal.* New York; 1974. p. 673–684.
10. Paglia DE, Valentine WN. Studies on the quantitative and qualitative characterization of erythrocyte glutathione peroxidase. *J. Lab. Clin. Med.* 1967; 70: 158–169.
11. Mc Cord JM, Fridovic I. Superoxide dismutase. An enzymic function for erythrocyte. *J. Biol. Chem.* 1969; 244: 6049–6055.
12. Zwart A, van Assendelft OW, Bull BS, England JM, Lewis SM, Zijlstra WG. Recommendations for reference method for haemoglobinometry in human blood (ICSH standard 1995) and specifications for international haemoglobinocyanide standard (4th edition). *J. Clin. Pathol.* 1996; 49: 271–274.

**Table E1: Characteristics of the participants included or non-selected in the analyses.**

|                                                   | All participants<br>n=1571 |                    | Participants included<br>n=1388 |                    | Participants non selected<br>n=183 |                    | p <sup>†</sup> |
|---------------------------------------------------|----------------------------|--------------------|---------------------------------|--------------------|------------------------------------|--------------------|----------------|
|                                                   | n                          | Percent, mean (SD) | n                               | Percent, mean (SD) | n                                  | Percent, mean (SD) |                |
| <b>Sex, women</b>                                 | 1571                       | 50.6               | 1388                            | 51.2               | 183                                | 46.5               | 0.23           |
| <b>Age, mean (SD)</b>                             | 1571                       | 42.8 (16.5)        | 1388                            | 43.0 (16.5)        | 183                                | 40.7 (16.9)        | 0.08           |
| <b>Smoking status</b>                             |                            |                    |                                 |                    |                                    |                    |                |
| Non smoker                                        | 780                        | 49.9               | 696                             | 50.1               | 84                                 | 48.0               | 0.24           |
| Ex-smoker                                         | 422                        | 27.0               | 380                             | 27.4               | 42                                 | 24.0               |                |
| Current smoker                                    | 361                        | 23.1               | 312                             | 22.5               | 49                                 | 28.0               |                |
| <b>Body Mass Index, kg/m<sup>2</sup></b>          |                            |                    |                                 |                    |                                    |                    |                |
| < 20                                              | 149                        | 10.7               | 145                             | 10.6               | 4                                  | 14.8               | 0.11           |
| [20-25[                                           | 717                        | 51.5               | 704                             | 51.6               | 13                                 | 48.2               |                |
| [25-30[                                           | 383                        | 27.5               | 379                             | 27.8               | 3                                  | 14.8               |                |
| ≥ 30                                              | 143                        | 10.3               | 137                             | 10.0               | 6                                  | 22.2               |                |
| <b>Ever asthma</b>                                | 1571                       | 43.5               | 1388                            | 44.2               | 183                                | 37.7               | 0.09           |
| <b>Current asthma</b>                             | 630                        | 88.6               | 572                             | 88.8               | 58                                 | 86.2               | 0.55           |
| <b>Asthma control</b>                             |                            |                    |                                 |                    |                                    |                    |                |
| Controlled                                        | 334                        | 57.8               | 311                             | 57.9               | 23                                 | 56.1               | 0.19           |
| Partly controlled                                 | 179                        | 31.0               | 169                             | 31.5               | 10                                 | 24.4               |                |
| Uncontrolled                                      | 65                         | 11.2               | 57                              | 10.6               | 8                                  | 19.5               |                |
| <b>Skin prick test positivity*</b>                | 1303                       | 56.2               | 1281                            | 56.3               | 22                                 | 50.0               | 0.56           |
| <b>Total IgE, ≥ 100 IU/mL</b>                     | 1396                       | 43.0               | 1383                            | 43.0               | 13                                 | 46.1               | 0.82           |
| <b>FEV1 % predicted, mean (SD)</b>                | 1387                       | 102 (18.0)         | 1360                            | 102 (18.1)         | 27                                 | 97.6 (15.1)        | 0.16           |
| <b>FEV1 &lt; 80% predicted</b>                    | 1387                       | 9.60               | 1360                            | 9.70               | 27                                 | 3.70               | 0.29           |
| <b>Methacholine challenge**,<br/>PD20 ≤4mg, %</b> | 866                        | 44.0               | 851                             | 44.3               | 15                                 | 26.7               | 0.17           |



FEV<sub>1</sub>: Forced expiratory volume in one second; IgE: Immunoglobulin E; \* Skin Prick Test positivity (SPT+) was defined by a mean wheal diameter  $\geq 3$ mm than the negative control for at least one of 12 aeroallergens; \*\*Methacholine challenge test was not performed if baseline FEV<sub>1</sub> <80% predicted; PD<sub>20</sub>: provocative dose causing a 20% fall in FEV<sub>1</sub>; † p-value of  $\chi^2$  test for categorical variables and Student test for quantitative variables.

**Table E2: Levels of biomarkers of response according to sociodemographic characteristics among participants without ever asthma (N=774).**

|                          | Catalase (k/g) |            |                              | n   | GPX (U/g)          |                              | n   | SOD (U/g)          |                              |  |
|--------------------------|----------------|------------|------------------------------|-----|--------------------|------------------------------|-----|--------------------|------------------------------|--|
|                          | n              | Mean (SD)  | p<br>P <sub>adjusted</sub> * |     | GM (Q1. Q3)        | p<br>P <sub>adjusted</sub> * |     | GM (Q1. Q3)        | p<br>P <sub>adjusted</sub> * |  |
| Age (years)              |                |            |                              |     |                    |                              |     |                    |                              |  |
| [16-25[                  | 93             | 169 (34.6) |                              | 93  | 38.9 (33.7 ; 44.0) |                              | 93  | 1265 (1083; 1517)  |                              |  |
| [25-35[                  | 133            | 154 (44.2) | <b>0.03</b>                  | 134 | 37.0 (32.5 ; 42.5) | <b>0.001</b>                 | 134 | 1260 (1083; 1511)  | <b>0.01</b>                  |  |
| [35-45[                  | 93             | 163 (38.6) | <b>0.04</b>                  | 96  | 38.9 (33.3 ; 44.0) | <b>0.01</b>                  | 96  | 1244 (1044; 1509)  | <b>0.003</b>                 |  |
| [45-55[                  | 181            | 168 (34.9) |                              | 182 | 40.6 (35.7 ; 46.7) |                              | 182 | 1204 (1206; 1413)  |                              |  |
| ≥ 55                     | 262            | 162 (40.8) |                              | 266 | 40.1 (35.0 ; 46.4) |                              | 265 | 1170 ( 960 ; 1410) |                              |  |
| p for trend adjusted*    |                |            | 0.94                         |     |                    | <b>0.01</b>                  |     |                    | <b>&lt;0.0001</b>            |  |
| Sex                      |                |            |                              |     |                    |                              |     |                    |                              |  |
| Men                      | 349            | 163 (39.4) | 0.77                         | 349 | 37.8 (33.1 ; 43.8) | <b>&lt; 0.0001</b>           | 350 | 1226 (1027; 1474)  | 0.31                         |  |
| Women                    | 413            | 164 (39.3) | 0.30                         | 420 | 40.7 (35.7 ; 46.7) | <b>&lt; 0.0001</b>           | 420 | 1204 (1021; 1453)  | 0.71                         |  |
| BMI (kg/m <sup>2</sup> ) |                |            |                              |     |                    |                              |     |                    |                              |  |
| < 20                     | 71             | 165 (33.9) |                              | 71  | 39.8 (35.4; 44.8)  |                              | 71  | 1194 (1009; 1421)  |                              |  |
| [20-25[                  | 376            | 160 (39.7) | 0.07                         | 382 | 39.2 (33.8; 45.7)  | 0.87                         | 382 | 1193 (1011; 1411)  | 0.28                         |  |
| [25-30[                  | 226            | 165 (41.1) | 0.06                         | 227 | 39.7 (35.1; 45.8)  | 0.62                         | 228 | 1232 (1034; 1470)  | 0.02                         |  |
| ≥ 30                     | 76             | 171 (37.1) |                              | 76  | 39.6 (35.8; 45.2)  |                              | 76  | 1247 (1034; 1606)  |                              |  |
| p for trend adjusted*    |                |            | <b>0.02</b>                  |     |                    | 0.73                         |     |                    | <b>0.003</b>                 |  |
| Smoking status           |                |            |                              |     |                    |                              |     |                    |                              |  |
| Non smoker               | 380            | 159 (39.3) |                              | 385 | 39.6 (34.9 ; 44.8) |                              | 386 | 1216 (1022; 1474)  |                              |  |
| Ex-smoker                | 225            | 167 (40.0) | <b>0.02</b>                  | 225 | 39.7 (34.0 ; 46.5) | 0.13                         | 225 | 1190 (1028; 1441)  | 0.24                         |  |
| Current smoker           | 157            | 167 (37.7) | <b>0.02</b>                  | 159 | 38.2 (33.6 ; 44.0) | 0.59                         | 159 | 1242 (1033; 1452)  | 0.42                         |  |
| p for trend adjusted*    |                |            | <b>0.004</b>                 |     |                    | 0.47                         |     |                    | 0.70                         |  |

GPX: glutathione peroxidase; SOD: superoxide dismutase; GM: geometric mean; BMI: Body Mass Index.

\*Results were adjusted for age, sex and smoking status.

**Table E3: Levels of biomarkers of damage according to sociodemographic characteristics among participants without ever asthma (N=774).**

|                               | 8-isoprostane (pg/mL) |                    |                                         | FIOPs (RFU/mL) |                    |                                         |
|-------------------------------|-----------------------|--------------------|-----------------------------------------|----------------|--------------------|-----------------------------------------|
|                               | n                     | GM (Q1 ; Q3)       | p<br>P <sub>adjusted</sub> <sup>*</sup> | n              | GM (Q1. Q3)        | p<br>P <sub>adjusted</sub> <sup>*</sup> |
| <b>Age (years)</b>            |                       |                    |                                         |                |                    |                                         |
| [16-25[                       | 52                    | 3.97 (1.75 ; 7.67) |                                         | 90             | 86.5 (74.9 ; 96.3) |                                         |
| [25-35[                       | 65                    | 2.73 (1.14 ; 8.08) | <b>0.04</b>                             | 129            | 89.3 (77.2 ; 101)  | <b>&lt; 0.0001</b>                      |
| [35-45[                       | 47                    | 1.98 (0.84 ; 5.28) | <b>0.03</b>                             | 91             | 92.0 (81.4 ; 101)  | <b>&lt; 0.0001</b>                      |
| [45-55[                       | 96                    | 2.52 (1.21 ; 5.70) |                                         | 177            | 96.9 (83.4 ; 112)  |                                         |
| ≥ 55                          | 113                   | 2.01 (0.74 ; 4.66) |                                         | 251            | 100 (87.0 ; 113)   |                                         |
| p for trend adjusted*         |                       |                    | <b>0.01</b>                             |                |                    | <b>&lt;0.0001</b>                       |
| <b>Sex</b>                    |                       |                    |                                         |                |                    |                                         |
| Men                           | 164                   | 2.08 (1.05 ; 5.18) | <b>0.04</b>                             | 335            | 93.1 (80.7 ; 105)  | <b>0.07</b>                             |
| Women                         | 209                   | 2.82 (1.14 ; 6.12) | <b>0.02</b>                             | 403            | 95.9 (82.3 ; 109)  | <b>0.03</b>                             |
| <b>BMI (kg/m<sup>2</sup>)</b> |                       |                    |                                         |                |                    |                                         |
| < 20                          | 38                    | 2.39 (0.74 ; 9.03) |                                         | 68             | 90.9 (76.5 ; 102)  |                                         |
| [20-25[                       | 193                   | 2.67 (1.10 ; 6.62) | 0.70                                    | 363            | 95.1 (82.7 ; 108)  | 0.17                                    |
| [25-30[                       | 100                   | 2.17 (1.19 ; 4.35) | 0.56                                    | 226            | 94.0 (80.3 ; 109)  | 0.34                                    |
| ≥ 30                          | 42                    | 2.38 (1.09 ; 5.67) |                                         | 73             | 98.4 (85.2 ; 107)  |                                         |
| p for trend adjusted*         |                       |                    | 0.45                                    |                |                    | 0.91                                    |
| <b>Smoking status</b>         |                       |                    |                                         |                |                    |                                         |
| Non smoker                    | 176                   | 2.62 (1.15 ; 6.15) |                                         | 367            | 91.8 (79.4 ; 103)  |                                         |
| Ex-smoker                     | 124                   | 2.16 (1.00 ; 5.24) | 0.45                                    | 220            | 98.0 (85.2 ; 113)  | <b>0.001</b>                            |
| Current smoker                | 73                    | 2.65 (1.22 ; 5.44) | 0.92                                    | 151            | 96.9 (85.1 ; 111)  | <b>0.0001</b>                           |
| p for trend adjusted*         |                       |                    | 0.80                                    |                |                    | <b>&lt;0.0001</b>                       |

FIOPS : Fluorescent oxidation products ; GM: geometric mean ; BMI: Body Mass Index.

\*Results were adjusted for age, sex and smoking status.

**Table E4: Associations between biomarkers of response related to oxidative stress, asthma and various asthma outcomes.**

|                                                           | Superoxide dismutase (U/g) |                   |                                  | Glutathione peroxidase (U/g) |                   |                                  | Catalase (k/g) |                   |                                  |
|-----------------------------------------------------------|----------------------------|-------------------|----------------------------------|------------------------------|-------------------|----------------------------------|----------------|-------------------|----------------------------------|
|                                                           | n                          | OR (95% CI)*      | OR <sub>adjusted</sub> (95% CI)* | n                            | OR (95% CI)*      | OR <sub>adjusted</sub> (95% CI)* | n              | OR (95% CI)*      | OR <sub>adjusted</sub> (95% CI)* |
| <b>Asthma ever<br/>(vs never asthma)</b>                  | 1377                       | 1.04 (0.91; 1.20) | 0.96 (0.83; 1.12)                | 1378                         | 0.91 (0.81; 1.03) | 1.01 (0.89; 1.15)                | 1368           | 0.97 (0.84; 1.11) | 0.97 (0.85; 1.12)                |
| <i>Among participants<br/>with ever asthma</i>            |                            |                   |                                  |                              |                   |                                  |                |                   |                                  |
| <b>Current asthma<br/>(vs without current)<br/>asthma</b> | 567                        | 1.04 (0.74; 1.46) | 1.08 (0.76; 1.54)                | 568                          | 0.85 (0.62; 1.17) | 0.83 (0.59; 1.15)                | 565            | 0.96 (0.66; 1.38) | 0.93 (0.64; 1.35)                |
| <b>Asthma attacks in the<br/>last 12 months</b>           | 604                        | 0.95 (0.68; 1.21) | 0.91 (0.64; 1.19)                | 606                          | 0.95 (0.74; 1.15) | 0.90 (0.68; 1.11)                | 603            | 1.10 (0.88; 1.32) | 1.13 (0.91; 1.35)                |
| <b>Poor asthma control**<br/>(vs controlled asthma)</b>   | 532                        | 0.87 (0.67; 1.13) | 0.91 (0.70; 1.19)                | 533                          | 0.87 (0.70; 1.09) | 0.82 (0.65; 1.04)                | 530            | 1.00 (0.79; 1.28) | 1.01 (0.79; 1.29)                |
| <b>FEV<sub>1</sub> &lt;80%<br/>predicted**</b>            | 596                        | 0.98 (0.69; 1.40) | 1.15 (0.77; 1.73)                | 598                          | 1.21 (0.93; 1.57) | 1.12 (0.84; 1.50)                | 595            | 1.04 (0.77; 1.39) | 1.02 (0.76; 1.36)                |

\*OR expressed for an increase corresponding to the value of the interquartile range (distance between the 25<sup>th</sup> and 75<sup>th</sup> percentile) of each biological marker;

Results were adjusted for age, sex and smoking status; \*\*Results were unchanged when restricting analyses to participants with current asthma;

FEV<sub>1</sub>: Forced expiratory volume in one second.
